# Supplementary material
Source: PubMed Central journal article supplement (PMC3033986)
Supplement: NIHMS263684-supplement-Supp__Code.pdf [file NIHMS263684-supplement-Supp__Code.pdf]

```

#####
##### Classical Measurement Error Regression Calibration Functions
##### used for biomarker subset only
#####

RCalib<-function(W){
  ##### W is the validation subset
  ### it has two columns indicating biomarker measurement for a particular nutrient
  ### at the first and second visits, sorted by id

  ### Within person mean
  Wsubj<-apply(W,1,mean,na.rm=T)
  ### Population mean
  mW<-mZ<-mean(Wsubj,na.rm=T)

  ### Variance of random error in W: var(Epsilon)
  relW<-!is.na(W[,1]) & !is.na(W[,2])
  varEps.hat<-mean(apply(W[relW,],1,var))

  ki<-ifelse(relW,2,1)
  ki<-ifelse(is.na(Wsubj),NA,ki)
  varZ.hat<- var(Wsubj,na.rm=T) - mean(varEps.hat/ki,na.rm=T)

  ##### ordinary Regression calibration: classical error model and no covariates
  Zstar<- mZ + varZ.hat/(varZ.hat + varEps.hat/ki)* (Wsubj - mW)
  return(Zstar)
}

```

```

##### Function for generating calibration equation and applying to the FFQ data #####
RC<-function(data,dat.val){
## dat.val: the validation set for generating the calibration equation, nested within the study
## cohort
## data: the study cohort with FFQ information. Variable 'innbs' equals 1 for a subject also in
## the validation subset. A subject's nutrient consumption is imputed differently depending on
## whether or not one's biomarker value is observed.

### center intake variables for regression calibration
data$scage<-data$ffqage- mean(dat.val$age[dat.val$visit==1],na.rm=T)
data$scbmi<-data$ffqbmi-mean(dat.val$bmi[dat.val$visit==1],na.rm=T)
data$sclogffqE<-data$logenrgy - mean(log(dat.val$ffqtee[dat.val$visit==1]),na.rm=T)
data$sclogffqP<-data$logprot - mean(log(dat.val$ffqprot[dat.val$visit==1]),na.rm=T)
data$sclogffqD<-data$logpep - mean(log(dat.val$ffqpep[dat.val$visit==1]),na.rm=T)

### Coefficients
dat.val$patno<-dat.val$comid
dat.val$scage<-dat.val$age- mean(dat.val$age[dat.val$visit==1],na.rm=T)
dat.val$scbmi<-dat.val$bmi-mean(dat.val$bmi[dat.val$visit==1],na.rm=T)
dat.val$sclogffqE<-log(dat.val$ffqtee) - mean(log(dat.val$ffqtee[dat.val$visit==1]),na.rm=T)
dat.val$sclogffqP<-log(dat.val$ffqprot) - mean(log(dat.val$ffqprot[dat.val$visit==1]),na.rm=T)
dat.val$sclogffqD<-log(dat.val$ffqpep) - mean(log(dat.val$ffqpep[dat.val$visit==1]),na.rm=T)

##### (i) apply calibration equation to subjects not in the validation subset ###
#####
### Calibration equation for ENERGY

```

```
logfit<-gee(log(teechr)~
clogffqE+cbmi+cage+black+hispanic+other+texpwk+income2+income3+income5+income6,id=
patno,data=dat.val)
```

```
summary(logfit)
```

```
t4coeff<-coef(logfit)
```

```
### Impute ENERGY
```

```
V<-cbind(rep(1,length(data$ffqage)),data$clogffqE,
```

```
data$cbmi,data$cage,data$black,data$hispanic,data$other,data$texpwk,data$income2,data$inco
me3,data$income5,data$income6)
```

```
data$zhat<-t(matrix(as.numeric(t4coeff), nrow=1) %*% t(V))
```

```
#####
```

```
### Calibration equation for PROTEIN
```

```
logfit<-gee(log(biopraw)~
```

```
clogffqP*cbmi+cage+black+hispanic+other+educ3+educ5+income2+income3+income5+incom
e6,id=patno,data=dat.val)
```

```
summary(logfit)
```

```
t4coeff<-coef(logfit)
```

```
### Impute PROTEIN
```

```
V<-cbind(rep(1,length(data$ffqage)),data$clogffqP,
```

```
data$cbmi,data$cage,data$black,data$hispanic,data$other,data$educ3,data$educ5,data$income2,
data$income3,data$income5,data$income6,data$clogffqP*data$cbmi)
```

```
data$pzhat<-t(matrix(as.numeric(t4coeff), nrow=1) %*% t(V))
```

```
#####
```

```
### Calibration equation for PERCENT ENERGY FROM PROTEIN
```

```
logfit<-gee(log(unpepC)~ clogffqD+cbmi+cage+smoke,id=patno,data=dat.val)
```

```
summary(logfit)
```

```
t4coeff<-coef(logfit)
```

```
### Impute PERCENT ENERGY FROM PROTEIN ###
```

```
V<-cbind(rep(1,length(data$ffqage)),data$clogffqD, data$cbmi,data$bage,data$smoke)
data$pepzhat<-t(matrix(as.numeric(t4coeff), nrow=1) %*% t(V))
```

```
#####
```

```
##### (ii) Imputing nutrients for subjects with biomarker measurement based on classical
measurement error model
```

```
#####
```

```
tmp1<-dat.val[dat.val$visit==1,]
```

```
tmp2<-dat.val[dat.val$visit==3,]
```

```
#####
```

```
##Energy
```

```
#####
```

```
W<-cbind(tmp1$teehrt,rep(NA,nrow(tmp1)))
```

```
W[tmp1$relstudy==1 & tmp1$dmdisp=="Comparison",2]<-tmp2$teehrt[tmp2$relstudy==1 &
tmp2$dmdisp=="Comparison"]
```

```
W[tmp1$relstudy==1 & tmp1$dmdisp!="Comparison",2]<-tmp2$teehrt[tmp2$relstudy==1 &
tmp2$dmdisp!="Comparison"]
```

```
W<-log(W)
```

```
Zstar<-RCalib(W)
```

```
data$zhat[data$innbs==1]<-Zstar[tmp1$dmdisp=="Comparison"]
```

```
#####
```

```
#protein
```

```
#####
```

```
W<-cbind(tmp1$biopraw,rep(NA,nrow(tmp1)))
```

```
W[tmp1$relstudy==1 & tmp1$dmdisp=="Comparison",2]<-tmp2$biopraw[tmp2$relstudy==1 &
tmp2$dmdisp=="Comparison"]
```

```
W[tmp1$relstudy==1 & tmp1$dmdisp!="Comparison",2]<-tmp2$biopraw[tmp2$relstudy==1 &
tmp2$dmdisp!="Comparison"]
```

```
W<-log(W)
```

```
Zstar<-RCalib(W)
```

```
data$pzhat[data$innbs==1]<-Zstar[tmp1$dmdisp=="Comparison"]
```

```
#####
```

```
#protein density
```

```
#####
```

```
W<-cbind(tmp1$unpepC,rep(NA,nrow(tmp1)))
```

```
W[tmp1$relstudy==1 & tmp1$dmdisp=="Comparison",2]<-tmp2$unpepC[tmp2$relstudy==1 &
tmp2$dmdisp=="Comparison"]
```

```
W[tmp1$relstudy==1 & tmp1$dmdisp!="Comparison",2]<-tmp2$unpepC[tmp2$relstudy==1 &
tmp2$dmdisp!="Comparison"]
```

```
W<-log(W)
```

```
Zstar<-RCalib(W)
```

```
data$pezhat[data$innbs==1]<-Zstar[tmp1$dmdisp=="Comparison"]
```

```
return(data)
```

```
}
```

```
removeNA<-function(x){
```

```
return(x[!is.na(x)])
```

```
}
```

```
#### Example of doing stratified bootstrap #####
```

```
### id.matrix contains sample id and strata information for the whole study cohort
```

```
### data is the cohort data
```

```
### dat.val is the nutritional biomarker data, observed at visit 1 or at both visit 1 and visit 3
```

```

> names(id.matrix)
[1] "strata" "comid" "innbs"

### resampling with strata #####
comid<-tapply(id.matrix$comid,id.matrix$strata,sample,replace=T)
comid<-unlist(comid)

#### resampling cohort data #####
data.boot<-data[removeNA(match(comid,data$comid)),]
### resampling biomarker data #####
dat.val.boot<-dat.val[c(removeNA(match(comid,dat.val$comid*(dat.val$visit==1))),
removeNA(match(comid,dat.val$comid*(dat.val$visit==3))))],

##### order data.boot and dat.val.boot #####3
oo<-order(dat.val.boot$dmdisp,dat.val.boot$relstudy,dat.val.boot$comid)
dat.val.boot<-dat.val.boot[oo,]
oo<-order(data.boot$innbs,data.boot$relstudy,data.boot$comid)
data.boot<-data.boot[oo,]

##### perform regression calibration #####
data.boot<-RC(data.boot,dat.val.boot)

##### fit cox regression model #####
fit<-coxph( Surv(randyr, Event) ~ zhat+texpwk+factor(ethnr)+factor(tabedu)+
factor(premmi)+factor(smoke)+factor(htn)+factor(diabtrt)+factor(statin)+factor(asa80mg)+facto
r(tothstat)+ strata(trial)+strata(ffqagecat),data=data.boot)

```
